# Supplementary material
Source: Springer Nature journal article supplement (https://www.springermedizin.de/resource/supplementary/12880_2013_221_MOESM2_ESM.pdf/9450262)

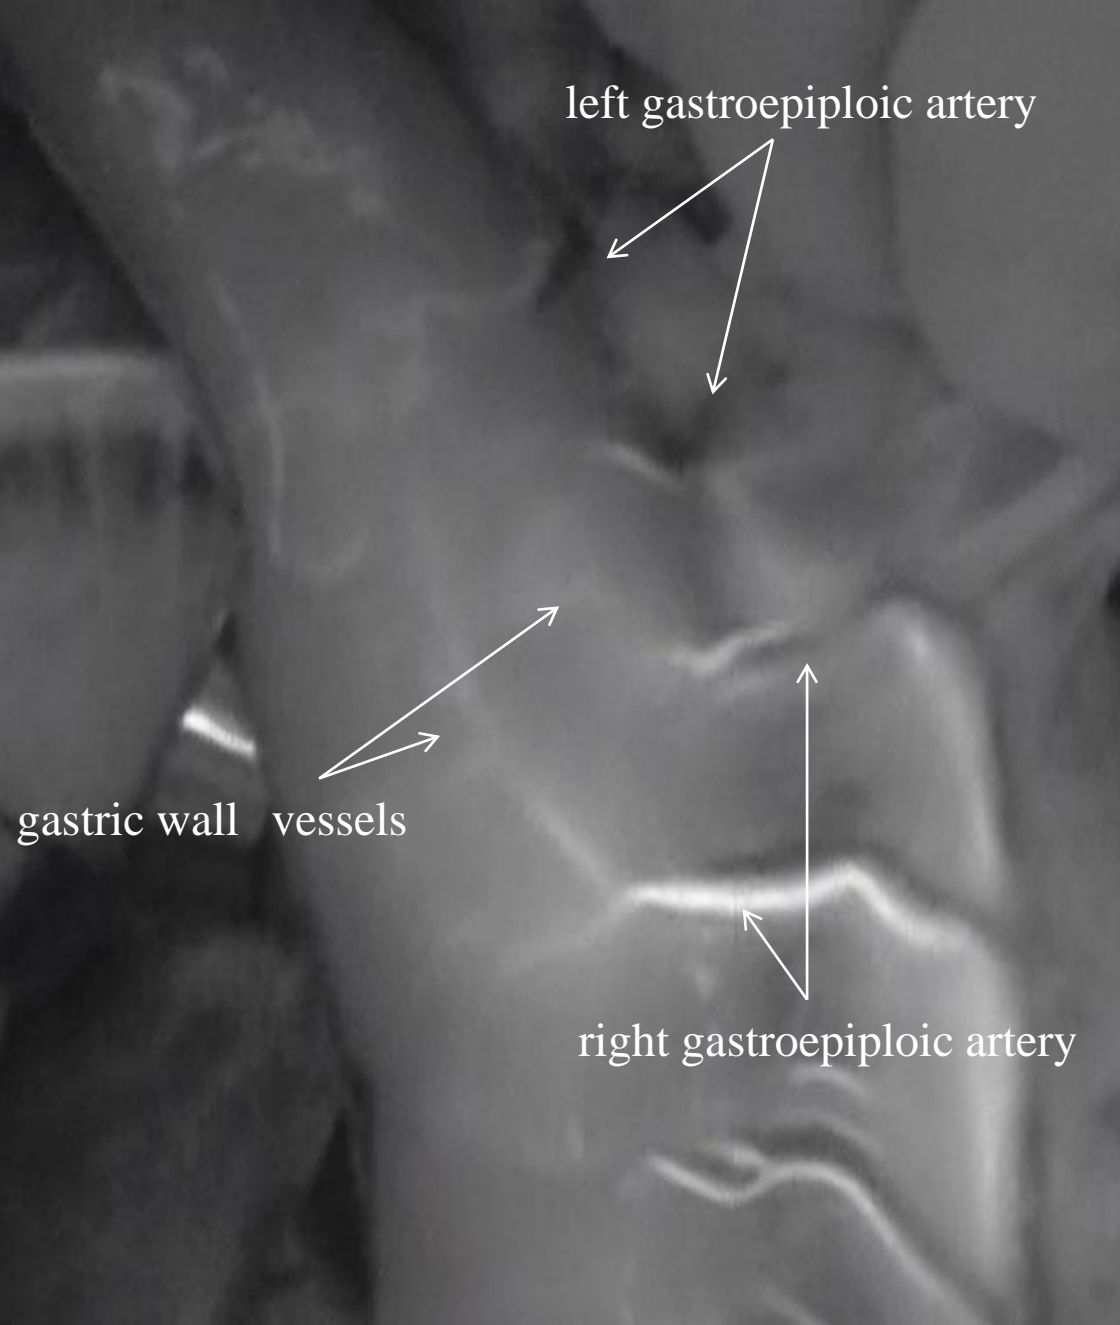

left gastroepiploic artery

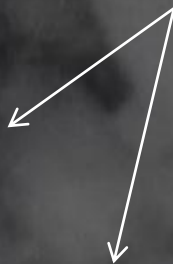

gastric wall vessels

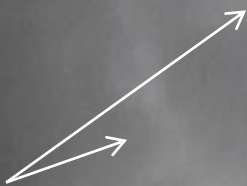

right gastroepiploic artery

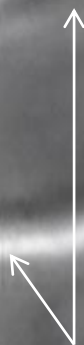

Supplement: MOESM2 [file 9450262]
